# Supplementary material
Source: MDPI journal article supplement (https://www.mdpi.com/2073-4395/13/11/2726)
Supplement: s1 [file s1]

## Supplementary material

Table S1. Anosim test performed on the experimental sites using fungi community structure.

| Group | R        | p-value | q-value |
|-------|----------|---------|---------|
| all   | 0.681424 | 0.001   | -       |
| CK-P4 | 0.96875  | 0.035   | 0.0525  |
| CK-P5 | 0.989583 | 0.035   | 0.0525  |
| CK-P6 | 0.979167 | 0.025   | 0.0525  |
| P4-P5 | 0.395833 | 0.06    | 0.0720  |
| P4-P6 | 0.59375  | 0.021   | 0.0525  |
| P5-P6 | 0.34375  | 0.142   | 0.1420  |

CK, P4, P5 and P6 indicate unmodified soda saline-alkali paddy fields and modification by phosphogypsum for 4, 5, and 6 years, respectively.

Table S2. Redundancy analysis and permutation test performed on the experimental sites using fungi community structure.

|                               | RDA1         | RDA2         | r2          | Pr(>r) |
|-------------------------------|--------------|--------------|-------------|--------|
| SWC                           | 0.788398268  | -0.615165157 | 0.024245549 | 0.861  |
| EC                            | -0.425099064 | 0.905146831  | 0.286724747 | 0.131  |
| pH                            | -0.999314868 | -0.037010733 | 0.313035007 | 0.073  |
| TOC                           | 0.867554523  | -0.497342084 | 0.446774765 | 0.015  |
| OM                            | 0.867554524  | -0.497342084 | 0.446774766 | 0.015  |
| TN                            | 0.879566119  | -0.475776673 | 0.414062883 | 0.029  |
| TP                            | 0.980656058  | 0.195738848  | 0.252957242 | 0.165  |
| TK                            | 0.177939326  | 0.984041461  | 0.257925418 | 0.127  |
| AP                            | 0.920199208  | 0.391450402  | 0.180003393 | 0.261  |
| NH <sub>4</sub> -N            | 0.94897699   | -0.315345323 | 0.23954274  | 0.163  |
| ENa                           | -0.820850464 | 0.571143165  | 0.29637946  | 0.100  |
| CEC                           | 0.769233692  | 0.638967548  | 0.01067639  | 0.900  |
| ESP%                          | -0.80491436  | 0.593390995  | 0.37508473  | 0.048  |
| HCO <sub>3</sub> <sup>-</sup> | -0.999987942 | 0.004910846  | 0.347656101 | 0.06   |
| Cl <sup>-</sup>               | -0.762598723 | 0.646871849  | 0.189673174 | 0.198  |
| SO <sub>4</sub> <sup>2-</sup> | 0.630756008  | 0.775981223  | 0.34089335  | 0.056  |
| Na <sup>+</sup>               | -0.729789025 | 0.683672421  | 0.375505905 | 0.046  |
| Mg <sup>2+</sup>              | -0.915774431 | -0.401692907 | 0.377411409 | 0.076  |
| K <sup>+</sup>                | -0.930774296 | -0.365594324 | 0.371021604 | 0.065  |
| Ca <sup>2+</sup>              | -0.99958482  | -0.028812962 | 0.329848931 | 0.081  |

SWC, soil water content; EC, electric conductivity; TC, total carbon; TOC, total organic carbon; SOM, soil organic matter; TN, total nitrogen; TP, total phosphorus; TK, total potassium; AP, available phosphorus; AK, available potassium; NH<sub>4</sub>-N, nitrate; NO<sub>3</sub>-N, ammonium; ENA, exchangeable sodium ion; CEC, cation exchange capacity; ESP, soil alkalinity.

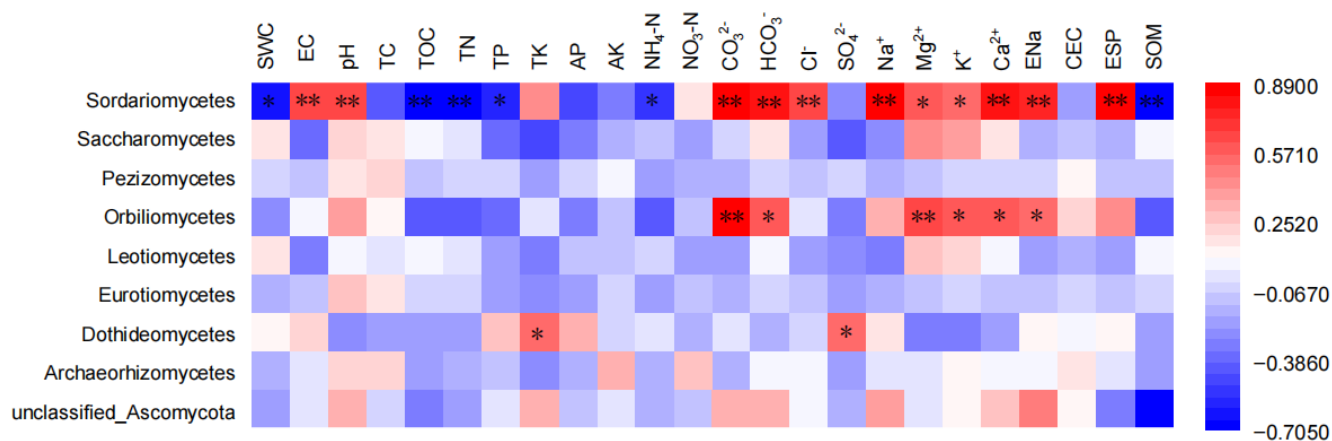

Figure S1. Pearson correlation analysis between the relative abundance of fungi at the Ascomycetes subphylum level and environmental factors (soil physicochemical characteristics and soil ions content). Correlation coefficients are colored from dark red (positive correlation) to dark blue (negative correlation). Color intensity is proportional to the correlation coefficients. SWC, soil water content; pH, potential of hydrogen; EC, electric conductivity; TC, total carbon; TOC, total organic carbon; SOM, soil organic matter; TN, total nitrogen; TP, total phosphorus; TK, total potassium; AP, available phosphorus; AK, available potassium; NH<sub>4</sub>-N, nitrate; NO<sub>3</sub>-N, ammonium; ENa, exchangeable sodium ion; CEC, cation exchange capacity; ESP, soil alkalinity. \*,  $P < 0.05$ ; \*\*,  $P < 0.01$ .
